# Supplementary material
Source: PubMed Central journal article supplement (PMC4063180)
Supplement: ja501127j_si_001.pdf [file ja501127j_si_001.pdf]

## Supporting Online Material for

### **Insights into the Binding of Pyridines to the Iron-Sulfur Enzyme IspH**

Ingrid Span<sup>1,&,\*</sup>, Ke Wang<sup>2</sup>, Wolfgang Eisenreich<sup>1</sup>, Adelbert Bacher<sup>1</sup>, Yong Zhang<sup>3</sup>, Eric Oldfield<sup>2</sup> and Michael Groll<sup>1</sup>

<sup>1</sup> Center for Integrated Protein Science Munich, Chemistry Department, Technische Universität München, Lichtenbergstrasse 4, 85747 Garching, Germany. <sup>2</sup> Department of Chemistry, 600 South Mathews Avenue, University of Illinois at Urbana-Champaign, Urbana, Illinois 61801, United States. <sup>3</sup> Department of Chemistry, Chemical Biology, and Biomedical Engineering, Stevens Institute of Technology, Castle Point on Hudson, Hoboken, New Jersey 07030, United States.

& Current address: Department of Molecular Biosciences, Northwestern University, 2205 Tech Drive, Evanston, Illinois 60208, United States.

\* To whom correspondence should be addressed: [span.ingrid@gmail.com](mailto:span.ingrid@gmail.com)

## Supplementary Figures

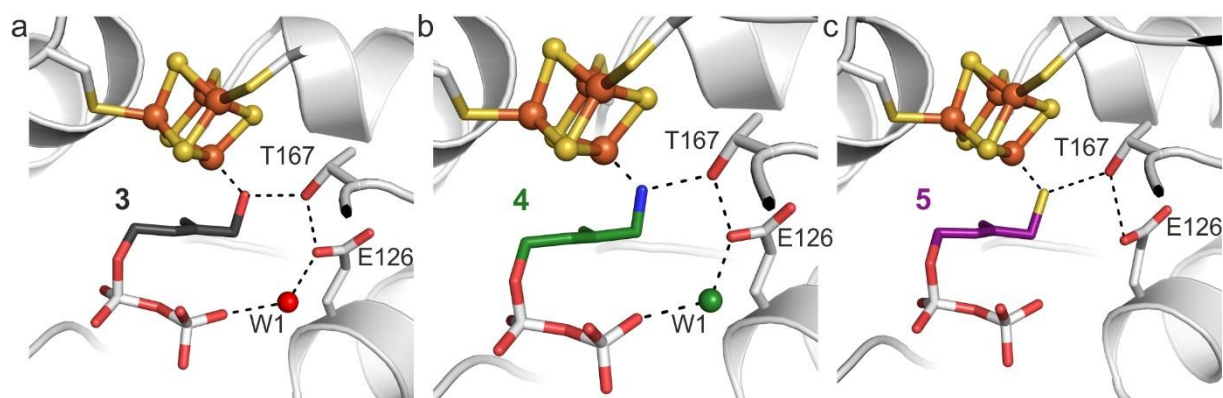

**Figure S1.** Structure of *E. coli* IspH bound to (a) (*E*)-1-hydroxy-2-methylbut-2-enyl 4-diphosphate (**3**)<sup>1</sup>, (b) the amino-substituted substrate **4**<sup>2</sup> and (c) the thiol-substituted substrate **5**<sup>2</sup>. The protein is displayed as a cartoon model the cofactors as ball-and-stick models, ligands as well as amino acid side chains as stick models, and water molecules as spheres. The dotted lines indicate metal coordination or hydrogen bonding.

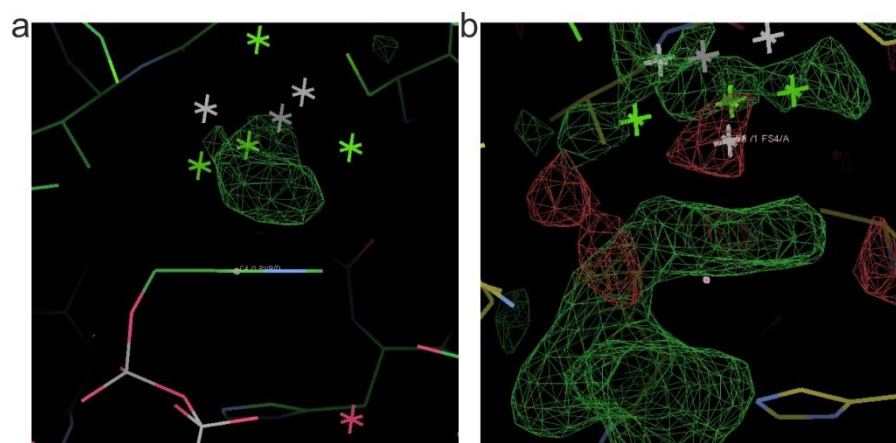

**Figure S2.**  $F_o - F_c$  map of the IspH-10 structure with (a) the apical iron omitted from the refinement and (b) the ligand **10** excluded from the refinement.

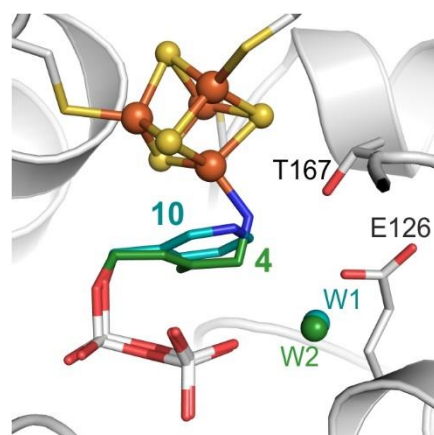

**Figure S3.** Structural superposition of the IspH-10 complex compared to the amino-derivative of the HMBPP substrate, **4**.

## Supplementary Tables

**Table S1.** Data collection and refinement statistics for the crystal structures of IspH in complex with **10**, **11**, **12**, and **13**.

|                                                     | <b>IspH:10</b>                                | <b>IspH:11</b>                                | <b>IspH:12</b>                                | <b>IspH:13</b>                                |
|-----------------------------------------------------|-----------------------------------------------|-----------------------------------------------|-----------------------------------------------|-----------------------------------------------|
| <b>Data collection</b>                              |                                               |                                               |                                               |                                               |
| Space group                                         | P2 <sub>1</sub> 2 <sub>1</sub> 2 <sub>1</sub> |
| Cell dimensions                                     |                                               |                                               |                                               |                                               |
| <i>a</i> , <i>b</i> , <i>c</i> (Å)                  | 69.78, 80.82, 111.25                          | 70.19, 80.46, 111.89                          | 69.47, 80.80, 111.49                          | 70.13, 80.90, 111.89                          |
| $\alpha$ , $\beta$ , $\gamma$ (°)                   | 90.0, 90.0, 90.0                              | 90.0, 90.0, 90.0                              | 90.0, 90.0, 90.0                              | 90.0, 90.0, 90.0                              |
| Resolution (Å)                                      | 40-1.7 (1.8-1.7)                              | 40-1.8 (1.9-1.8)                              | 30-1.9 (2.0-1.9)                              | 30-1.9 (2.0-1.9)                              |
| <i>R</i> <sub>sym</sub> (%)                         | 5.2 (57.4)                                    | 8.8 (41.6)                                    | 9.0 (42.1)                                    | 7.3 (50.3)                                    |
| <i>I</i> / $\sigma$ ( <i>I</i> )                    | 14.44 (2.38)                                  | 8.92 (2.81)                                   | 11.37 (2.82)                                  | 16.87 (4.68)                                  |
| Completeness (%)                                    | 95.3 (95.2)                                   | 99.0 (99.4)                                   | 98.7 (95.6)                                   | 99.9 (100.0)                                  |
| Redundancy                                          | 5.3                                           | 3.9                                           | 6.9                                           | 8.9                                           |
| <b>Refinement</b>                                   |                                               |                                               |                                               |                                               |
| Resolution (Å)                                      | 10-1.7                                        | 10-1.8                                        | 15-1.9                                        | 15-1.9                                        |
| No. reflections                                     | 62840                                         | 55376                                         | 46969                                         | 48176                                         |
| <i>R</i> <sub>work</sub> / <i>R</i> <sub>free</sub> | 0.203 / 0.247                                 | 0.177 / 0.224                                 | 0.218 / 0.256                                 | 0.215 / 0.249                                 |
| No. atoms                                           |                                               |                                               |                                               |                                               |
| Protein                                             | 4802                                          | 4789                                          | 4789                                          | 4789                                          |
| Ligand/ion                                          | 32                                            | 32                                            | 32                                            | 34                                            |
| Water                                               | 242                                           | 539                                           | 246                                           | 190                                           |
| <i>B</i> -factors                                   |                                               |                                               |                                               |                                               |
| Protein                                             | 41.4                                          | 25.8                                          | 36.6                                          | 34.9                                          |
| Ligand/ion                                          | 27.5                                          | 27.0                                          | 22.3                                          | 28.4                                          |
| Water                                               | 38.6                                          | 38.0                                          | 34.2                                          | 30.6                                          |
| R.m.s. deviations                                   |                                               |                                               |                                               |                                               |
| Bond lengths (Å)                                    | 0.010                                         | 0.008                                         | 0.010                                         | 0.009                                         |
| Bond angles (°)                                     | 1.3                                           | 1.3                                           | 1.4                                           | 1.4                                           |
| Ramachandran plot (%)                               | 99.2 / 0.8 / 0.0                              | 99.2 / 0.8 / 0.0                              | 98.7 / 1.3 / 0.0                              | 98.9 / 1.1 / 0.0                              |
| PDB ID                                              | 4MUX                                          | 4MUY                                          | 4MV0                                          | 4MV5                                          |

**Table S2.** Comprehensive analysis of the occupancy of the apical iron site in the [Fe<sub>4</sub>S<sub>4</sub>] cluster of IspH.

| Occupancy [%] | Rwork/Rfree | B-factor Fe1 | B-factor Fe2 | B-factor Fe3 | B-factor Fe4 | Difference electron density |
|---------------|-------------|--------------|--------------|--------------|--------------|-----------------------------|
| 100           | 0.214/0.277 | 26,7         | 25,1         | 64,6         | 28,85        | positive                    |
| 90            | 0.212/0.278 | 26,75        | 25,25        | 73,4         | 29           | little positive             |
| 80            | 0.212/0.278 | 26,75        | 25,3         | 70,45        | 29           | little positive             |
| 70            | 0.212/0.278 | 26,8         | 25,3         | 66,95        | 29,1         | none                        |
| 60            | 0.212/0.278 | 26,8         | 25,3         | 62,65        | 29,1         | none                        |
| 50            | 0.212/0.276 | 26,8         | 25,1         | 57,85        | 29           | none                        |
| 40            | 0.212/0.276 | 26,8         | 25,1         | 52,9         | 29           | little negative             |
| 30            | 0.212/0.276 | 26,8         | 25,1         | 47,25        | 29,05        | negative                    |
| 20            | 0.212/0.276 | 26,8         | 25,1         | 43,95        | 29,05        | negative                    |
| 10            | 0.212/0.279 | 26,8         | 25,35        | 39,85        | 29,1         | negative                    |
| 0             | 0.213/0.279 | 26,85        | 25,35        | n/a          | 29,2         | negative                    |

**Table S3.** Geometric and spectroscopic properties in various QM models.

|                    |        | Coordination      | $R_{\text{FeN}}$ (Å) | $R_{\text{FeC}}$ (Å) | $A_{\text{iso}}^{\text{N}}$ (MHz) | $\text{NQCC}^{\text{N}}$ |      |
|--------------------|--------|-------------------|----------------------|----------------------|-----------------------------------|--------------------------|------|
|                    |        | Mode              |                      |                      |                                   | (MHz)                    |      |
| Expt <sup>a)</sup> | Red/Ox | $\eta^2$          | 2.3                  | 2.4                  |                                   |                          |      |
| Expt <sup>b)</sup> | Red    |                   |                      |                      | 7.4                               | 3.0                      |      |
| Small-Fopt         | Ox     | pyr               | $\eta^1$             | 2.1                  | 3.0                               | -                        | 3.0  |
|                    |        | pyrH <sup>+</sup> | $\eta^2$             | 2.1                  | 2.0                               | -                        | 2.3  |
|                    | Red    | pyr               | $\eta^1$             | 2.1                  | 3.0                               | 9.6                      | 2.2  |
|                    |        | pyrH <sup>+</sup> | $\eta^2$             | 2.1                  | 2.0                               | 2.3                      | 2.8  |
| Small-Popt1        | Ox     | pyr               | $\eta^1$             | 2.2                  | 2.7                               | -                        | -0.5 |
|                    |        | pyrH <sup>+</sup> | $\eta^2$             | 2.1                  | 2.1                               | -                        | 2.3  |
|                    | Red    | pyr               | $\eta^2$             | 2.0                  | 2.1                               | 6.9                      | 3.6  |
|                    |        | pyrH <sup>+</sup> | $\eta^2$             | 2.0                  | 2.0                               | 2.1                      | 2.8  |
| Small-Popt2        | Ox     | pyr               | $\eta^2$             | 2.1                  | 2.3                               | -                        | 4.2  |
|                    |        | pyrH <sup>+</sup> | $\eta^2$             | 2.0                  | 2.1                               | -                        | 2.3  |
|                    | Red    | pyr               | $\eta^2$             | 2.0                  | 2.1                               | 6.6                      | 3.5  |
|                    |        | pyrH <sup>+</sup> | $\eta^2$             | 2.0                  | 2.1                               | 1.1                      | 2.8  |
| Big-Popt           | Ox     | pyr               | $\eta^1$             | 2.1                  | 3.0                               | -                        | 3.0  |
|                    |        | pyrH <sup>+</sup> | $\eta^2$             | 2.1                  | 2.1                               | -                        | 1.7  |
|                    | Red    | pyr               | $\eta^2$             | 2.0                  | 2.2                               | 6.6                      | 3.5  |
|                    |        | pyrH <sup>+</sup> | $\eta^2$             | 2.1                  | 2.0                               | 1.2                      | 2.4  |

<sup>a)</sup> This work; <sup>b)</sup> 3.

**Table S4.** Coordinates of the optimized structure of Small-Fopt model for Ox/pyr.

|    |             |             |              |
|----|-------------|-------------|--------------|
| C  | 5.37463000  | -3.72874100 | -7.64167200  |
| S  | 4.13724400  | -4.35660100 | -8.85963000  |
| C  | -2.65212300 | -1.34019600 | -9.74218300  |
| S  | -1.59579500 | -1.62831700 | -8.25543800  |
| C  | 2.52801300  | 2.78512800  | -7.12553200  |
| S  | 3.84335500  | 1.83018500  | -8.00654800  |
| Fe | 2.87397100  | -2.58570900 | -9.35766300  |
| S  | 2.06209500  | -1.54285700 | -7.46339300  |
| Fe | 0.50503200  | -1.40047200 | -9.00779900  |
| S  | 1.09028300  | -2.99887400 | -10.62000200 |
| Fe | 1.97253500  | -0.95536500 | -11.20324200 |
| S  | 4.04401400  | -0.92720300 | -10.44608100 |
| Fe | 2.68277200  | 0.14014500  | -8.92838000  |
| S  | 0.82189400  | 0.67298500  | -10.04842800 |
| C  | 1.85420500  | -1.56279900 | -15.46592300 |
| C  | 1.61258500  | -0.29142300 | -16.00065800 |
| C  | 1.41356700  | 0.77384800  | -15.11459700 |
| C  | 1.89206900  | -1.72380100 | -14.08323200 |
| N  | 1.70953100  | -0.69152900 | -13.22067200 |
| C  | 1.46663800  | 0.53771200  | -13.74272800 |
| H  | 4.86845100  | -3.32012000 | -6.75417600  |
| H  | 5.99896100  | -2.94136500 | -8.09060500  |
| H  | -2.46065100 | -0.34281100 | -10.16738400 |
| H  | -2.45740200 | -2.10201100 | -10.51298400 |
| H  | 2.02619000  | 2.15898900  | -6.37230200  |
| H  | 1.77530300  | 3.16199700  | -7.83448700  |
| H  | 1.57549000  | -0.13575700 | -17.08281800 |
| H  | 1.21413700  | 1.78575300  | -15.47746500 |
| H  | 2.06611900  | -2.69900800 | -13.62019400 |
| H  | 1.30894800  | 1.33510000  | -13.01111800 |
| H  | 3.00462000  | 3.63884000  | -6.61637600  |
| H  | 6.01955900  | -4.56859300 | -7.33566200  |
| H  | -3.70992200 | -1.40307200 | -9.43786400  |
| H  | 2.00956800  | -2.43124800 | -16.11165800 |

**Table S5.** Coordinates of the optimized structure of Small-Fopt model for Ox/pyrH<sup>+</sup>.

|    |             |             |              |
|----|-------------|-------------|--------------|
| C  | 5.48007400  | -3.72228400 | -7.88296800  |
| S  | 4.30451400  | -4.21588400 | -9.21044800  |
| C  | -2.54115800 | -1.44281400 | -10.27396300 |
| S  | -1.47490000 | -1.93575300 | -8.85247800  |
| C  | 2.29915100  | 2.62889800  | -7.31496100  |
| S  | 3.69153100  | 1.60184400  | -7.95685100  |
| Fe | 3.03960800  | -2.50278900 | -9.66489400  |
| S  | 2.06735400  | -1.74389700 | -7.80897400  |
| Fe | 0.59885400  | -1.56891100 | -9.47854500  |
| S  | 1.42143100  | -2.93495400 | -11.08291800 |
| Fe | 2.25794200  | -0.89720300 | -11.54714400 |
| S  | 4.22905500  | -0.82851800 | -10.48634400 |
| Fe | 2.69958700  | -0.00474200 | -9.08506600  |
| S  | 0.94035700  | 0.50417900  | -10.31328900 |
| C  | 1.50512700  | -1.51361900 | -14.34977800 |
| C  | 0.52142000  | -0.64955800 | -14.75592900 |
| C  | 0.62032800  | 0.74817800  | -14.43365400 |
| C  | 2.61020200  | -1.07735700 | -13.53886900 |
| N  | 2.63809100  | 0.32152200  | -13.19971100 |
| C  | 1.66932500  | 1.21280100  | -13.70561800 |
| H  | 4.93212600  | -3.40132200 | -6.98520300  |
| H  | 6.13200200  | -2.90582000 | -8.22649100  |
| H  | -2.39530900 | -0.38034500 | -10.51926300 |
| H  | -2.32267900 | -2.05817800 | -11.15940400 |
| H  | 1.65999300  | 2.04091400  | -6.64044000  |
| H  | 1.69120400  | 3.03094900  | -8.13812200  |
| H  | -0.32060400 | -1.00995600 | -15.35115600 |
| H  | -0.13506800 | 1.45523200  | -14.78226200 |
| H  | 3.58871800  | -1.55812700 | -13.64296300 |
| H  | 1.81716800  | 2.25731300  | -13.42976900 |
| H  | 2.74303800  | 3.46272600  | -6.74899000  |
| H  | 6.09608100  | -4.60155000 | -7.63923200  |
| H  | -3.58912600 | -1.60334200 | -9.97696600  |
| H  | 1.48069000  | -2.57108300 | -14.62435200 |
| H  | 3.55808100  | 0.72974700  | -13.02047200 |

**Table S6.** Coordinates of the optimized structure of Small-Fopt model for Red/pyr.

|    |             |             |              |
|----|-------------|-------------|--------------|
| C  | 5.45238700  | -3.71813800 | -7.85147700  |
| S  | 3.90857000  | -4.38811900 | -8.61934100  |
| C  | -2.70332200 | -1.05744100 | -10.04250000 |
| S  | -1.82140600 | -1.29983900 | -8.43618900  |
| C  | 2.74654700  | 2.68622800  | -6.77557100  |
| S  | 3.94117900  | 1.86668500  | -7.92971800  |
| Fe | 2.72044600  | -2.53913000 | -9.18833700  |
| S  | 1.86144900  | -1.35682800 | -7.37423500  |
| Fe | 0.38975700  | -1.19639300 | -9.02658200  |
| S  | 0.96520600  | -2.90741200 | -10.53968700 |
| Fe | 1.96530300  | -0.89769800 | -11.13268900 |
| S  | 4.02342700  | -0.99927700 | -10.29581200 |
| Fe | 2.67339700  | 0.23164300  | -8.86750500  |
| S  | 0.87630400  | 0.85655700  | -10.08772100 |
| C  | 2.21137900  | -1.61502800 | -15.39299800 |
| C  | 1.48294100  | -0.57346900 | -16.00912800 |
| C  | 0.90973100  | 0.40067700  | -15.15998800 |
| C  | 2.33952900  | -1.64676900 | -14.01249600 |
| N  | 1.78485000  | -0.70265800 | -13.18631800 |
| C  | 1.07498000  | 0.30238300  | -13.78577200 |
| H  | 5.21560800  | -3.13664300 | -6.94626400  |
| H  | 5.98281900  | -3.05999300 | -8.55785000  |
| H  | -2.43303800 | -0.08780500 | -10.49077200 |
| H  | -2.44245300 | -1.85724000 | -10.75405700 |
| H  | 2.34078900  | 1.95911900  | -6.05403500  |
| H  | 1.90611400  | 3.13358700  | -7.33048900  |
| H  | 1.36213600  | -0.52689500 | -17.09562600 |
| H  | 0.33225200  | 1.23759400  | -15.56719800 |
| H  | 2.89401100  | -2.44145000 | -13.50552800 |
| H  | 0.64245700  | 1.03381200  | -13.09648800 |
| H  | 3.27024900  | 3.48395200  | -6.21889500  |
| H  | 6.11421900  | -4.55763700 | -7.57265400  |
| H  | -3.79365300 | -1.07827900 | -9.86696800  |
| H  | 2.68172300  | -2.40528500 | -15.98800600 |



**Table S7.** Coordinates of the optimized structure of Small-Fopt model for Red/pyrH<sup>+</sup>.

|    |             |             |              |
|----|-------------|-------------|--------------|
| C  | 5.65794500  | -3.42018600 | -8.24602500  |
| S  | 4.09354100  | -4.11691000 | -8.93195200  |
| C  | -2.69191900 | -1.38626300 | -10.40129100 |
| S  | -1.74149800 | -1.63343500 | -8.83650200  |
| C  | 2.50310600  | 2.42717200  | -6.83653100  |
| S  | 3.65180700  | 1.78586500  | -8.13697400  |
| Fe | 2.81080200  | -2.40427600 | -9.49050100  |
| S  | 1.84413800  | -1.39795500 | -7.72632300  |
| Fe | 0.39845000  | -1.34784000 | -9.42462900  |
| S  | 1.18881800  | -2.88661900 | -10.91801700 |
| Fe | 2.08588600  | -0.89345000 | -11.50104000 |
| S  | 4.04819500  | -0.82962100 | -10.40392200 |
| Fe | 2.55122100  | 0.17214000  | -9.13659000  |
| S  | 0.82547800  | 0.66301300  | -10.41659000 |
| C  | 1.53346300  | -1.69746200 | -14.27248100 |
| C  | 0.61719300  | -0.84822000 | -14.83577000 |
| C  | 0.74687800  | 0.57380900  | -14.63687500 |
| C  | 2.59676800  | -1.23281700 | -13.41506600 |
| N  | 2.63123700  | 0.20062700  | -13.18628200 |
| C  | 1.74765900  | 1.06834400  | -13.86307600 |
| H  | 5.44943500  | -2.79363400 | -7.36571100  |
| H  | 6.17630600  | -2.80916300 | -9.00123500  |
| H  | -2.52772500 | -0.37454600 | -10.80326100 |
| H  | -2.39521400 | -2.12597100 | -11.16104300 |
| H  | 2.31286600  | 1.65484500  | -6.07543000  |
| H  | 1.54357900  | 2.74057600  | -7.27554200  |
| H  | -0.20408100 | -1.23924800 | -15.44193900 |
| H  | 0.04316400  | 1.26904600  | -15.10065200 |
| H  | 3.57362100  | -1.72699900 | -13.45887900 |
| H  | 1.89912200  | 2.12898200  | -13.65756800 |
| H  | 2.97711900  | 3.29779300  | -6.35237000  |
| H  | 6.30941900  | -4.25732100 | -7.94505400  |
| H  | -3.76481300 | -1.51348700 | -10.18092300 |
| H  | 1.47930600  | -2.77691300 | -14.43878800 |
| H  | 3.54293500  | 0.59642200  | -12.95265800 |

**Table S8.** Coordinates of the optimized structure of Small-Popt1 model for Ox/pyr.

|    |             |             |              |
|----|-------------|-------------|--------------|
| C  | 4.82299100  | -4.25499600 | -8.24801900  |
| S  | 3.67715100  | -4.21818900 | -9.69106500  |
| C  | -2.61100000 | -1.46299700 | -10.41500400 |
| S  | -2.12081900 | -2.08251200 | -8.75109900  |
| C  | 2.91901000  | 2.68199500  | -7.06700300  |
| S  | 2.81199000  | 1.05028700  | -6.20878900  |
| Fe | 2.46230300  | -2.36086900 | -9.43039300  |
| S  | 1.42660600  | -2.18440300 | -7.36298900  |
| Fe | 0.01532100  | -1.45904600 | -8.87997300  |
| S  | 0.81435500  | -2.26107900 | -10.89460300 |
| Fe | 1.61409600  | -0.09839700 | -10.57261100 |
| S  | 3.60672200  | -0.35397400 | -9.61481000  |
| Fe | 2.02703000  | -0.05398700 | -7.98348400  |
| S  | 0.25284400  | 0.85947100  | -9.02251300  |
| C  | 2.54497700  | -1.37692900 | -14.16694100 |
| C  | 1.62880900  | -0.96441500 | -15.14582800 |
| C  | 0.83841800  | 0.17538700  | -14.92297800 |
| C  | 2.62435300  | -0.60801600 | -13.01154400 |
| N  | 1.78011100  | 0.41947100  | -12.72625200 |
| C  | 0.91302200  | 0.83492700  | -13.69203400 |
| H  | 4.25533200  | -4.29319000 | -7.30599400  |
| H  | 5.47209000  | -3.36595000 | -8.23605800  |
| H  | -2.34680200 | -0.40078300 | -10.53184300 |
| H  | -2.11368800 | -2.04492800 | -11.20556700 |
| H  | 1.91632100  | 3.05990300  | -7.31724900  |
| H  | 3.51326700  | 2.60395700  | -7.99049300  |
| H  | 1.52939000  | -1.51872100 | -16.08456900 |
| H  | 0.13886700  | 0.52663100  | -15.68701600 |
| H  | 3.36697500  | -0.83797100 | -12.24304100 |
| H  | 0.25534500  | 1.66649700  | -13.42542900 |
| H  | 3.41619400  | 3.40119300  | -6.39370400  |
| H  | 5.45351900  | -5.15615600 | -8.32351700  |
| H  | -3.70419400 | -1.56780000 | -10.52682000 |
| H  | 3.19261400  | -2.24582900 | -14.29912500 |

**Table S9.** Coordinates of the optimized structure of Small-Popt1 model for Ox/pyrH<sup>+</sup>.

|    |             |             |              |
|----|-------------|-------------|--------------|
| C  | 4.82292600  | -4.25500900 | -8.24803600  |
| S  | 3.64273400  | -4.39615800 | -9.64726200  |
| C  | -2.61098800 | -1.46299600 | -10.41498700 |
| S  | -1.64147100 | -1.66877600 | -8.86332900  |
| C  | 2.91905500  | 2.68196300  | -7.06707600  |
| S  | 3.85651500  | 1.11217100  | -7.29164800  |
| Fe | 2.72471300  | -2.43389100 | -9.76407000  |
| S  | 1.84635200  | -1.87567200 | -7.79619200  |
| Fe | 0.44222700  | -1.22844200 | -9.39472300  |
| S  | 1.11759400  | -2.34863100 | -11.22588400 |
| Fe | 2.28110200  | -0.42656500 | -11.32695200 |
| S  | 4.18524500  | -0.83597200 | -10.25220800 |
| Fe | 2.72458900  | -0.05764700 | -8.76835900  |
| S  | 1.07885400  | 0.90096100  | -9.88039000  |
| C  | 2.54483000  | -1.37641800 | -14.16674200 |
| C  | 1.31303300  | -1.30405300 | -14.76313300 |
| C  | 0.48530400  | -0.16017800 | -14.51247400 |
| C  | 3.00820300  | -0.38234400 | -13.24696300 |
| N  | 2.15067000  | 0.74585400  | -13.01523000 |
| C  | 0.91317700  | 0.83446000  | -13.69215900 |
| H  | 4.28340100  | -4.05918400 | -7.30976800  |
| H  | 5.54683900  | -3.44677900 | -8.42781700  |
| H  | -2.52807600 | -0.43552600 | -10.80021800 |
| H  | -2.26706900 | -2.17174600 | -11.18297300 |
| H  | 1.91072100  | 2.48269100  | -6.67712700  |
| H  | 2.84275300  | 3.23578600  | -8.01359500  |
| H  | 0.97125400  | -2.09168700 | -15.43761100 |
| H  | -0.49196100 | -0.06019600 | -14.98940400 |
| H  | 4.07866900  | -0.17269400 | -13.17050700 |
| H  | 0.34030600  | 1.73656200  | -13.47339100 |
| H  | 3.47356300  | 3.28972100  | -6.33498700  |
| H  | 5.36404000  | -5.21037700 | -8.16008000  |
| H  | -3.66700700 | -1.67093100 | -10.18233500 |
| H  | 3.21913700  | -2.21355600 | -14.36597800 |
| H  | 2.59912300  | 1.64393800  | -12.81549000 |

**Table S10.** Coordinates of the optimized structure of Small-Popt1 model for Red/pyr.

|    |             |             |              |
|----|-------------|-------------|--------------|
| C  | 4.82297500  | -4.25500400 | -8.24801600  |
| S  | 3.51920100  | -4.53001200 | -9.52418800  |
| C  | -2.61099300 | -1.46301600 | -10.41499200 |
| S  | -1.80387400 | -1.33538000 | -8.75832400  |
| C  | 2.91900500  | 2.68200600  | -7.06702500  |
| S  | 4.11473500  | 1.49630700  | -7.81872800  |
| Fe | 2.65322800  | -2.43456700 | -9.73765300  |
| S  | 1.84480000  | -1.67843000 | -7.71597200  |
| Fe | 0.39441800  | -0.98659500 | -9.28394200  |
| S  | 0.94301100  | -2.26629600 | -11.13005100 |
| Fe | 2.17405400  | -0.29850400 | -11.31976400 |
| S  | 4.13667700  | -0.80674700 | -10.29728900 |
| Fe | 2.73214900  | 0.06144300  | -8.80394200  |
| S  | 1.08604200  | 1.12132900  | -9.85346600  |
| C  | 2.54490900  | -1.37683100 | -14.16693900 |
| C  | 1.34596100  | -1.26102800 | -14.83881900 |
| C  | 0.52658800  | -0.10143900 | -14.63290700 |
| C  | 2.95677200  | -0.31586100 | -13.29311300 |
| N  | 2.10819200  | 0.76846000  | -13.01959100 |
| C  | 0.91310500  | 0.83484600  | -13.69202800 |
| H  | 4.37448000  | -3.89036200 | -7.31031300  |
| H  | 5.55849000  | -3.51058600 | -8.59279400  |
| H  | -2.46134400 | -0.54293100 | -11.00248300 |
| H  | -2.19135100 | -2.30786600 | -10.98245100 |
| H  | 2.22238600  | 2.16951300  | -6.38359400  |
| H  | 2.32937200  | 3.17642700  | -7.85526600  |
| H  | 0.99913200  | -2.06136600 | -15.50266500 |
| H  | -0.41849800 | 0.01848300  | -15.17339600 |
| H  | 4.02536200  | -0.13423200 | -13.12919700 |
| H  | 0.27329200  | 1.68228400  | -13.41707100 |
| H  | 3.47282900  | 3.44999000  | -6.49448100  |
| H  | 5.34647900  | -5.20696800 | -8.04638200  |
| H  | -3.69578500 | -1.62275900 | -10.27922100 |
| H  | 3.18570400  | -2.25697400 | -14.28360200 |

**Table S11.** Coordinates of the optimized structure of Small-Popt1 model for Red/pyr.

|    |             |             |              |
|----|-------------|-------------|--------------|
| C  | 4.82299100  | -4.25500100 | -8.24800400  |
| S  | 3.45888900  | -4.44409200 | -9.46741500  |
| C  | -2.61099700 | -1.46300300 | -10.41499700 |
| S  | -1.70464600 | -1.37099100 | -8.80971900  |
| C  | 2.91900300  | 2.68200000  | -7.06700500  |
| S  | 4.08128500  | 1.50140000  | -7.87085100  |
| Fe | 2.64820400  | -2.40260300 | -9.68841700  |
| S  | 1.87663500  | -1.57967700 | -7.73914200  |
| Fe | 0.43690700  | -1.01550300 | -9.35880900  |
| S  | 1.01873700  | -2.30968400 | -11.14452800 |
| Fe | 2.23615400  | -0.41523500 | -11.35416600 |
| S  | 4.15687500  | -0.90190500 | -10.30690300 |
| Fe | 2.79686800  | 0.06596600  | -8.90274800  |
| S  | 1.14910900  | 1.06878100  | -9.99566600  |
| C  | 2.54496000  | -1.37692400 | -14.16697500 |
| C  | 1.31705000  | -1.30214100 | -14.77559600 |
| C  | 0.48900100  | -0.15664900 | -14.51891200 |
| C  | 3.01017200  | -0.39458100 | -13.23957300 |
| N  | 2.15742200  | 0.75065200  | -13.01633200 |
| C  | 0.91304300  | 0.83492800  | -13.69201800 |
| H  | 4.44040300  | -3.84165000 | -7.30227100  |
| H  | 5.60599800  | -3.58513300 | -8.63615600  |
| H  | -2.53848900 | -0.51417000 | -10.96962500 |
| H  | -2.20576800 | -2.27298900 | -11.04043600 |
| H  | 2.25943800  | 2.16453000  | -6.35292700  |
| H  | 2.29590300  | 3.18335400  | -7.82367300  |
| H  | 0.96493400  | -2.10063300 | -15.43245700 |
| H  | -0.50009700 | -0.06674300 | -14.97497700 |
| H  | 4.08156400  | -0.18681700 | -13.16999500 |
| H  | 0.32666400  | 1.72152900  | -13.44611800 |
| H  | 3.50511400  | 3.44129700  | -6.52065300  |
| H  | 5.26441800  | -5.24675500 | -8.05259600  |
| H  | -3.67370600 | -1.66906000 | -10.20473300 |
| H  | 3.20965100  | -2.22647500 | -14.35009300 |
| H  | 2.61076900  | 1.64837800  | -12.82884100 |

**Table S12.** Coordinates of the optimized structure of Small-Popt2 model for Ox/pyr.

|    |             |             |              |
|----|-------------|-------------|--------------|
| C  | 4.82299200  | -4.25499900 | -8.24801500  |
| S  | 3.72215100  | -4.41135900 | -9.72555100  |
| C  | -2.61100100 | -1.46299800 | -10.41500100 |
| S  | -1.66727800 | -1.46169100 | -8.82837600  |
| C  | 2.91899300  | 2.68201600  | -7.06700400  |
| S  | 4.06600700  | 1.28293500  | -7.41824700  |
| Fe | 2.71188500  | -2.42674500 | -9.89204300  |
| S  | 1.88388300  | -1.78839000 | -7.84826800  |
| Fe | 0.47406900  | -1.08059000 | -9.38381500  |
| S  | 1.02387900  | -2.20546700 | -11.29934500 |
| Fe | 2.25503200  | -0.19703600 | -11.37097400 |
| S  | 4.16484700  | -0.75118400 | -10.41133900 |
| Fe | 2.79746500  | 0.07684700  | -8.80511700  |
| S  | 1.12433600  | 1.09411100  | -9.85106500  |
| C  | 2.54501300  | -1.37700800 | -14.16699900 |
| C  | 1.25288400  | -1.34120500 | -14.69617900 |
| C  | 0.44596900  | -0.19808000 | -14.50535100 |
| C  | 3.01101100  | -0.22371300 | -13.50448000 |
| N  | 2.18034500  | 0.82906600  | -13.18251400 |
| C  | 0.91297200  | 0.83502400  | -13.69200800 |
| H  | 4.22591200  | -4.05343200 | -7.34621500  |
| H  | 5.54754700  | -3.43835500 | -8.38696800  |
| H  | -2.57251300 | -0.47626700 | -10.90259000 |
| H  | -2.20288500 | -2.21807300 | -11.10361600 |
| H  | 1.97058100  | 2.32077200  | -6.64282400  |
| H  | 2.70419000  | 3.25288300  | -7.98204700  |
| H  | 0.85585700  | -2.20348900 | -15.23975200 |
| H  | -0.56373700 | -0.15348200 | -14.92306400 |
| H  | 4.07036400  | -0.08001100 | -13.28072700 |
| H  | 0.28525200  | 1.67712000  | -13.38625300 |
| H  | 3.40076600  | 3.34885900  | -6.33184600  |
| H  | 5.36937900  | -5.20337700 | -8.11954400  |
| H  | -3.66249400 | -1.70751900 | -10.19220300 |
| H  | 3.19742500  | -2.24445400 | -14.29010800 |

**Table S13.** Coordinates of the optimized structure of Small-Popt2 model for Ox/pyrH<sup>+</sup>.

|    |             |             |              |
|----|-------------|-------------|--------------|
| C  | 4.82301200  | -4.25500700 | -8.24798400  |
| S  | 3.63596300  | -4.24700600 | -9.65621600  |
| C  | -2.61098300 | -1.46300600 | -10.41498200 |
| S  | -1.62073500 | -1.41760800 | -8.86050400  |
| C  | 2.91901000  | 2.68197500  | -7.06699200  |
| S  | 4.05441300  | 1.32174900  | -7.55001100  |
| Fe | 2.73804900  | -2.26303600 | -9.77921600  |
| S  | 1.87995000  | -1.62436000 | -7.81736800  |
| Fe | 0.46263400  | -0.97127100 | -9.41097900  |
| S  | 1.11228800  | -2.14852800 | -11.22025600 |
| Fe | 2.25488400  | -0.19692400 | -11.37110400 |
| S  | 4.18559700  | -0.67428000 | -10.34695700 |
| Fe | 2.76855700  | 0.13663300  | -8.86827900  |
| S  | 1.11192700  | 1.14581500  | -9.93205300  |
| C  | 2.54502700  | -1.37703900 | -14.16698600 |
| C  | 1.29309000  | -1.33316300 | -14.72170400 |
| C  | 0.46064300  | -0.19666700 | -14.45349000 |
| C  | 3.02172100  | -0.34103300 | -13.29633500 |
| N  | 2.19620700  | 0.81799100  | -13.10785800 |
| C  | 0.91305100  | 0.83500200  | -13.69195300 |
| H  | 4.29689200  | -4.05492600 | -7.30314200  |
| H  | 5.60943800  | -3.50028000 | -8.39541100  |
| H  | -2.59567400 | -0.48773000 | -10.92446300 |
| H  | -2.22698500 | -2.23849800 | -11.09396000 |
| H  | 2.01396800  | 2.29091800  | -6.58024400  |
| H  | 2.63225500  | 3.28634000  | -7.93945900  |
| H  | 0.93159900  | -2.14127900 | -15.36062200 |
| H  | -0.55087900 | -0.13537600 | -14.86049700 |
| H  | 4.09455300  | -0.14770800 | -13.22941600 |
| H  | 0.32900700  | 1.73094800  | -13.47598700 |
| H  | 3.45637200  | 3.32087100  | -6.34757700  |
| H  | 5.28274400  | -5.25426300 | -8.20452500  |
| H  | -3.64951300 | -1.70519900 | -10.14135700 |
| H  | 3.22143200  | -2.21530400 | -14.35255100 |
| H  | 2.65663300  | 1.72944400  | -13.02418900 |

**Table S14.** Coordinates of the optimized structure of Small-Popt2 model for Red/pyr.

|    |             |             |              |
|----|-------------|-------------|--------------|
| C  | 4.82298700  | -4.25500200 | -8.24799900  |
| S  | 3.54886100  | -4.45650700 | -9.56797200  |
| C  | -2.61100500 | -1.46300200 | -10.41500200 |
| S  | -1.74605500 | -1.25403900 | -8.79423300  |
| C  | 2.91899300  | 2.68200300  | -7.06699200  |
| S  | 4.16067900  | 1.55679400  | -7.83294200  |
| Fe | 2.71924300  | -2.34460400 | -9.78119000  |
| S  | 1.89629700  | -1.58983100 | -7.76894000  |
| Fe | 0.44906000  | -0.88957000 | -9.34327900  |
| S  | 1.01258200  | -2.16873200 | -11.17606100 |
| Fe | 2.25507100  | -0.19699700 | -11.37100000 |
| S  | 4.21331500  | -0.72297800 | -10.35242100 |
| Fe | 2.80130200  | 0.13518100  | -8.86145100  |
| S  | 1.16130200  | 1.21678500  | -9.90667900  |
| C  | 2.54500600  | -1.37701800 | -14.16700100 |
| C  | 1.31558500  | -1.29598900 | -14.78560100 |
| C  | 0.49202900  | -0.13944600 | -14.57741300 |
| C  | 2.98706200  | -0.27870900 | -13.35393700 |
| N  | 2.14599800  | 0.81449600  | -13.08794300 |
| C  | 0.91294900  | 0.83501600  | -13.69200500 |
| H  | 4.35976700  | -3.89192600 | -7.31683300  |
| H  | 5.59665300  | -3.53297900 | -8.55506200  |
| H  | -2.55447000 | -0.54357400 | -11.02011700 |
| H  | -2.15633100 | -2.28479400 | -10.98930800 |
| H  | 2.22107300  | 2.12454900  | -6.42142800  |
| H  | 2.33469700  | 3.19152400  | -7.84942000  |
| H  | 0.94449000  | -2.12456500 | -15.39966400 |
| H  | -0.48445400 | -0.05372100 | -15.06592900 |
| H  | 4.06033500  | -0.08730600 | -13.23849600 |
| H  | 0.27636000  | 1.68416900  | -13.41536400 |
| H  | 3.43758700  | 3.44148000  | -6.45105400  |
| H  | 5.30358000  | -5.23012700 | -8.05124800  |
| H  | -3.67397700 | -1.69788600 | -10.22807100 |
| H  | 3.18681900  | -2.25726000 | -14.27603800 |



**Table S15.** Coordinates of the optimized structure of Small-Popt2 model for Red/pyr.

|    |             |             |              |
|----|-------------|-------------|--------------|
| C  | 4.82303300  | -4.25500900 | -8.24795500  |
| S  | 3.44768400  | -4.31475500 | -9.47691700  |
| C  | -2.61099000 | -1.46300400 | -10.41498500 |
| S  | -1.69190300 | -1.14082500 | -8.84327800  |
| C  | 2.91899700  | 2.68199100  | -7.06697300  |
| S  | 4.14881400  | 1.58233700  | -7.86743200  |
| Fe | 2.66929800  | -2.24996400 | -9.70791900  |
| S  | 1.89075200  | -1.39461000 | -7.76920300  |
| Fe | 0.45949800  | -0.78986700 | -9.38927000  |
| S  | 1.03140400  | -2.10449500 | -11.15659000 |
| Fe | 2.25489700  | -0.19697700 | -11.37116700 |
| S  | 4.18134200  | -0.75398200 | -10.35297900 |
| Fe | 2.84215500  | 0.21637600  | -8.94546400  |
| S  | 1.21776700  | 1.29509100  | -10.01116900 |
| C  | 2.54496800  | -1.37700800 | -14.16699200 |
| C  | 1.29846200  | -1.33006400 | -14.73428800 |
| C  | 0.46469900  | -0.19142400 | -14.46230500 |
| C  | 3.02043100  | -0.35638200 | -13.27513800 |
| N  | 2.19792300  | 0.81992900  | -13.09996900 |
| C  | 0.91309500  | 0.83500700  | -13.69192900 |
| H  | 4.46535600  | -3.85235500 | -7.28798100  |
| H  | 5.64881100  | -3.62444400 | -8.61258400  |
| H  | -2.59438100 | -0.58244800 | -11.07630500 |
| H  | -2.17174300 | -2.31897900 | -10.94910500 |
| H  | 2.22323200  | 2.10319400  | -6.44009100  |
| H  | 2.33812700  | 3.22812600  | -7.82600400  |
| H  | 0.93102000  | -2.14534200 | -15.36160500 |
| H  | -0.55472200 | -0.13833800 | -14.85244000 |
| H  | 4.09436900  | -0.16054300 | -13.22261200 |
| H  | 0.31778500  | 1.71739200  | -13.45046700 |
| H  | 3.44477600  | 3.41143900  | -6.42487900  |
| H  | 5.19512600  | -5.28090000 | -8.09212700  |
| H  | -3.65825100 | -1.69530100 | -10.16074700 |
| H  | 3.21346000  | -2.22563600 | -14.33861500 |
| H  | 2.66325500  | 1.72971000  | -13.03418200 |

**Table S16.** Coordinates of the optimized structure of Big-Popt model for Ox/pyr.

|    |             |             |              |
|----|-------------|-------------|--------------|
| C  | 5.09747400  | -5.63275500 | -7.69991000  |
| C  | 4.25830000  | -4.36314800 | -7.85221800  |
| S  | 2.91867100  | -4.59542800 | -9.11488900  |
| C  | -4.05307500 | -1.83360200 | -10.40294600 |
| C  | -3.35752200 | -0.63088800 | -9.76252700  |
| S  | -2.33735800 | -1.10640700 | -8.28469500  |
| C  | 2.73780200  | 5.86859200  | -10.97354300 |
| C  | 1.90462100  | 4.77911500  | -10.30213500 |
| O  | 1.55390300  | 3.83446000  | -11.32581500 |
| C  | 0.64716900  | 5.34302700  | -9.62460500  |
| C  | 3.56395600  | 3.85365600  | -6.28484100  |
| C  | 2.71834600  | 2.60711300  | -6.55250000  |
| S  | 3.70841700  | 1.34390800  | -7.48372900  |
| Fe | 1.98266500  | -2.58219800 | -9.34391800  |
| S  | 1.22393600  | -1.66637800 | -7.35862000  |
| Fe | -0.19032800 | -1.07830300 | -8.93719800  |
| S  | 0.25404600  | -2.49704100 | -10.72838700 |
| Fe | 1.51858400  | -0.57619000 | -10.98905500 |
| S  | 3.48931100  | -1.02841000 | -10.12068200 |
| Fe | 2.21358600  | 0.05145500  | -8.54666300  |
| S  | 0.52999300  | 1.02807500  | -9.68197500  |
| O  | 4.60284300  | -2.14589100 | -15.15975900 |
| C  | 3.79567000  | -1.25020000 | -15.91094800 |
| C  | 2.62975500  | -0.64722500 | -15.14478800 |
| C  | 1.60735500  | 0.05890200  | -15.80091100 |
| C  | 0.57351600  | 0.61782800  | -15.04721900 |
| C  | 2.55629900  | -0.76052300 | -13.75635800 |
| N  | 1.53948500  | -0.24533500 | -13.02125200 |
| C  | 0.56760900  | 0.44222300  | -13.66376600 |
| H  | 3.78564400  | -4.09071700 | -6.89479700  |
| H  | 4.88978200  | -3.51607700 | -8.16454600  |
| H  | 5.88814200  | -5.48595600 | -6.94062300  |
| H  | -4.10202400 | 0.10544100  | -9.41299600  |
| H  | -2.71041700 | -0.12060200 | -10.49319000 |
| H  | -3.30938100 | -2.56498400 | -10.75831700 |
| H  | 2.52936000  | 4.27735000  | -9.53512200  |
| H  | 0.06145800  | 4.53222000  | -9.16041000  |
| H  | 0.90480600  | 6.07280000  | -8.83606900  |
| H  | 0.00782500  | 5.84466200  | -10.37198100 |

|   |             |             |              |
|---|-------------|-------------|--------------|
| H | 1.26581000  | 3.01037800  | -10.87246500 |
| H | 3.05557300  | 6.63060200  | -10.24199600 |
| H | 2.37783600  | 2.15934200  | -5.60415800  |
| H | 1.82210300  | 2.86651600  | -7.13815700  |
| H | 2.98652900  | 4.60211900  | -5.71009400  |
| H | 3.40928000  | -1.72382200 | -16.83962900 |
| H | 4.48170200  | -0.44466300 | -16.22609100 |
| H | 1.62275600  | 0.17130600  | -16.89079600 |
| H | -0.23354200 | 1.18138600  | -15.52252900 |
| H | 3.33642600  | -1.27534300 | -13.19078000 |
| H | -0.22660700 | 0.84906400  | -13.03319900 |
| H | 4.47302000  | -6.48561200 | -7.38465900  |
| H | 5.58253700  | -5.90354800 | -8.65273700  |
| H | 4.46866300  | 3.60079800  | -5.70645600  |
| H | 3.88978300  | 4.31940000  | -7.22929900  |
| H | 2.14793200  | 6.36612300  | -11.76330300 |
| H | 3.63484700  | 5.42929000  | -11.43843500 |
| H | -4.70729100 | -2.34380000 | -9.67632600  |
| H | -4.67286700 | -1.51768100 | -11.26436700 |
| H | 4.04032300  | -2.88563700 | -14.85893600 |

**Table S17.** Coordinates of the optimized structure of Big-Popt model for Ox/pyrH<sup>+</sup>.

|    |             |             |              |
|----|-------------|-------------|--------------|
| C  | 5.09700800  | -5.63200000 | -7.70099900  |
| C  | 4.79252300  | -4.18695100 | -8.10303000  |
| S  | 3.86146800  | -4.13325700 | -9.70899600  |
| C  | -4.05300800 | -1.83400700 | -10.40300600 |
| C  | -2.66008200 | -1.24529500 | -10.64908500 |
| S  | -1.53839300 | -1.60723400 | -9.21343200  |
| C  | 2.73801000  | 5.86800900  | -10.97300500 |
| C  | 2.50367300  | 4.94899800  | -12.17869900 |
| O  | 2.96188400  | 3.59055700  | -11.91499500 |
| C  | 3.24677100  | 5.41344000  | -13.42577800 |
| C  | 3.56400000  | 3.85499600  | -6.28399700  |
| C  | 2.78595300  | 2.69078700  | -6.90483700  |
| S  | 3.95782400  | 1.53957800  | -7.77257000  |
| Fe | 2.91436100  | -2.18689400 | -9.99032000  |
| S  | 1.92733600  | -1.59800100 | -8.07883500  |
| Fe | 0.53570200  | -1.08973000 | -9.74464300  |
| S  | 1.34691800  | -2.23462000 | -11.52254500 |
| Fe | 2.37076600  | -0.23900400 | -11.65408900 |
| S  | 4.27940700  | -0.51379100 | -10.53303700 |
| Fe | 2.75886300  | 0.23642700  | -9.08892400  |
| S  | 1.06645800  | 1.06742800  | -10.25152800 |
| O  | 4.60299000  | -2.14699800 | -15.15999300 |
| C  | 3.19634700  | -2.30387500 | -14.93694200 |
| C  | 2.47997900  | -1.01369300 | -14.58216300 |
| C  | 1.25931200  | -0.70016300 | -15.13459300 |
| C  | 0.58322300  | 0.50818200  | -14.76815000 |
| C  | 3.06940600  | -0.13328900 | -13.60258400 |
| N  | 2.37285400  | 1.06820200  | -13.26673200 |
| C  | 1.14286800  | 1.36947200  | -13.87511300 |
| H  | 4.17592600  | -3.68718400 | -7.34020100  |
| H  | 5.71889900  | -3.60330600 | -8.22668100  |
| H  | 5.65931400  | -5.64423100 | -6.75071900  |
| H  | -2.71377600 | -0.15218000 | -10.77980700 |
| H  | -2.21135500 | -1.67616900 | -11.55829200 |
| H  | -4.00594500 | -2.92840500 | -10.28452900 |
| H  | 1.41522800  | 4.91792500  | -12.39288000 |
| H  | 3.06630300  | 4.72839400  | -14.27000200 |
| H  | 2.90998300  | 6.41931600  | -13.72408900 |
| H  | 4.33166900  | 5.44856200  | -13.23382900 |

|   |             |             |              |
|---|-------------|-------------|--------------|
| H | 2.62408300  | 3.30388900  | -11.04177600 |
| H | 2.38086000  | 6.88758700  | -11.19310800 |
| H | 2.25433300  | 2.11658200  | -6.12936100  |
| H | 2.03727400  | 3.05425400  | -7.62627800  |
| H | 2.87100600  | 4.52968400  | -5.75060900  |
| H | 3.00021100  | -3.04072100 | -14.13340200 |
| H | 2.75734700  | -2.70792000 | -15.86502800 |
| H | 0.80478400  | -1.36719800 | -15.87268500 |
| H | -0.37799900 | 0.76478200  | -15.21866500 |
| H | 4.15915600  | -0.06940900 | -13.53995700 |
| H | 0.70107100  | 2.31544600  | -13.56358200 |
| H | 4.16997000  | -6.21002500 | -7.55882200  |
| H | 5.70652200  | -6.14299300 | -8.46406400  |
| H | 4.31247100  | 3.49331700  | -5.56064800  |
| H | 4.09099800  | 4.44013600  | -7.05487000  |
| H | 3.81154000  | 5.91670500  | -10.72643900 |
| H | 2.19160300  | 5.50906800  | -10.08379800 |
| H | -4.50928500 | -1.41183800 | -9.49301200  |
| H | -4.71642400 | -1.60757400 | -11.25674800 |
| H | 5.07435500  | -2.49624400 | -14.38278600 |
| H | 2.88293200  | 1.90696700  | -12.92100900 |

**Table S18.** Coordinates of the optimized structure of Big-Popt model for Red/pyr.

|    |             |             |              |
|----|-------------|-------------|--------------|
| C  | 5.09703500  | -5.63203000 | -7.70096000  |
| C  | 4.84431100  | -4.18679200 | -8.14716700  |
| S  | 4.03058400  | -4.14006800 | -9.81138400  |
| C  | -4.05303300 | -1.83400100 | -10.40301000 |
| C  | -2.65090800 | -1.23084700 | -10.52798300 |
| S  | -1.63889100 | -1.53612200 | -9.00336300  |
| C  | 2.73800900  | 5.86805200  | -10.97298900 |
| C  | 1.81874800  | 4.70286500  | -10.60928900 |
| O  | 1.42696500  | 4.07831000  | -11.84124300 |
| C  | 0.57899400  | 5.16202600  | -9.82563800  |
| C  | 3.56399800  | 3.85497700  | -6.28402600  |
| C  | 3.00201100  | 2.51750600  | -6.79192200  |
| S  | 3.96198700  | 1.88845600  | -8.25752300  |
| Fe | 2.97202500  | -2.13951000 | -10.10487200 |
| S  | 2.09219400  | -1.41747500 | -8.12342700  |
| Fe | 0.49269500  | -1.07405200 | -9.66470600  |
| S  | 1.18441700  | -2.41747800 | -11.40820800 |
| Fe | 2.00376100  | -0.30461200 | -11.82749000 |
| S  | 4.09583800  | -0.33069800 | -10.94803300 |
| Fe | 2.71625300  | 0.36908400  | -9.31920400  |
| S  | 0.87148800  | 1.09067800  | -10.34713700 |
| O  | 4.60299200  | -2.14699800 | -15.16001500 |
| C  | 3.26125700  | -2.63006400 | -14.95336200 |
| C  | 2.22199300  | -1.55065100 | -14.76042200 |
| C  | 0.95278600  | -1.65879500 | -15.28957300 |
| C  | -0.03917500 | -0.68013700 | -14.97533000 |
| C  | 2.52422300  | -0.40250300 | -13.94174100 |
| N  | 1.54050200  | 0.52218900  | -13.59338700 |
| C  | 0.28164900  | 0.33127100  | -14.09177400 |
| H  | 4.18985000  | -3.67168700 | -7.42592000  |
| H  | 5.79492500  | -3.62763700 | -8.18932200  |
| H  | 5.59409600  | -5.66238800 | -6.71090100  |
| H  | -2.71558200 | -0.14288400 | -10.69934800 |
| H  | -2.12568300 | -1.67031400 | -11.39135500 |
| H  | -3.99544100 | -2.92585300 | -10.25445700 |
| H  | 2.38671300  | 3.98326700  | -9.98803200  |
| H  | -0.04946700 | 4.29195500  | -9.57541300  |
| H  | 0.85639900  | 5.66836300  | -8.88233600  |
| H  | -0.02020200 | 5.86111600  | -10.43750600 |

|   |             |             |              |
|---|-------------|-------------|--------------|
| H | 1.28707300  | 3.12347600  | -11.64585400 |
| H | 3.07163400  | 6.41066500  | -10.07091000 |
| H | 3.03596000  | 1.75907400  | -5.99078300  |
| H | 1.94669300  | 2.63801100  | -7.08663300  |
| H | 2.99239000  | 4.21957600  | -5.40809000  |
| H | 3.23485600  | -3.31002700 | -14.07651700 |
| H | 3.02000500  | -3.23056800 | -15.84766800 |
| H | 0.69365400  | -2.51537800 | -15.92455400 |
| H | -1.04834800 | -0.74669000 | -15.39372600 |
| H | 3.54958600  | -0.01642600 | -13.92468200 |
| H | -0.46732000 | 1.05025200  | -13.73942400 |
| H | 4.14652800  | -6.18717100 | -7.62963800  |
| H | 5.74035100  | -6.16185000 | -8.42528200  |
| H | 4.62193500  | 3.74919300  | -5.98615000  |
| H | 3.51552300  | 4.62329800  | -7.07406100  |
| H | 2.21064000  | 6.57906400  | -11.63538300 |
| H | 3.62596500  | 5.49297300  | -11.50644000 |
| H | -4.59097700 | -1.40676000 | -9.53849500  |
| H | -4.65306700 | -1.63876500 | -11.31387300 |
| H | 4.91945900  | -1.84487700 | -14.28714000 |

**Table S19.** Coordinates of the optimized structure of Big-Popt model for Red/pyrH<sup>+</sup>.

|    |             |             |              |
|----|-------------|-------------|--------------|
| C  | 5.09700200  | -5.63199800 | -7.70100100  |
| C  | 4.96254100  | -4.17659000 | -8.15786500  |
| S  | 4.21568100  | -4.08982800 | -9.85317000  |
| C  | -4.05300200 | -1.83400400 | -10.40300300 |
| C  | -2.61682000 | -1.36900900 | -10.67288600 |
| S  | -1.46787300 | -1.93526200 | -9.32819400  |
| C  | 2.73800600  | 5.86799200  | -10.97300100 |
| C  | 1.91867100  | 4.66573900  | -10.52167800 |
| O  | 2.02326000  | 3.65995000  | -11.55135800 |
| C  | 0.44907200  | 5.02409300  | -10.26489000 |
| C  | 3.56400000  | 3.85500600  | -6.28399700  |
| C  | 2.88750800  | 2.54374600  | -6.71369800  |
| S  | 3.86224400  | 1.74259700  | -8.07865200  |
| Fe | 3.11199000  | -2.17797500 | -10.13167500 |
| S  | 2.07183700  | -1.64517200 | -8.21335200  |
| Fe | 0.61259100  | -1.31353100 | -9.87962300  |
| S  | 1.53763800  | -2.38569200 | -11.67908200 |
| Fe | 2.35346700  | -0.28329200 | -11.78242700 |
| S  | 4.27865200  | -0.35812200 | -10.64958800 |
| Fe | 2.71993600  | 0.23510300  | -9.20107300  |
| S  | 0.93695100  | 0.89044100  | -10.36843100 |
| O  | 4.60299500  | -2.14699600 | -15.15999800 |
| C  | 3.16640900  | -2.17484100 | -15.13327800 |
| C  | 2.51616700  | -0.86039600 | -14.74621600 |
| C  | 1.35944600  | -0.41981200 | -15.34107100 |
| C  | 0.75855700  | 0.82192200  | -14.93198600 |
| C  | 3.11856900  | -0.10804600 | -13.66754800 |
| N  | 2.48562100  | 1.13137300  | -13.29089800 |
| C  | 1.32710100  | 1.58159300  | -13.95906200 |
| H  | 4.31645100  | -3.61171900 | -7.46828500  |
| H  | 5.94690900  | -3.67990300 | -8.17935400  |
| H  | 5.55751200  | -5.68169100 | -6.69657600  |
| H  | -2.57185300 | -0.26904400 | -10.73217600 |
| H  | -2.25892000 | -1.77006700 | -11.63534700 |
| H  | -4.10798600 | -2.93428700 | -10.35314700 |
| H  | 2.36145900  | 4.26134800  | -9.58996300  |
| H  | -0.11803200 | 4.13233800  | -9.95117300  |
| H  | 0.35656000  | 5.78483200  | -9.46915400  |
| H  | -0.01366700 | 5.42256300  | -11.18478900 |



|   |             |             |              |
|---|-------------|-------------|--------------|
| H | 1.69695800  | 2.81799400  | -11.14310800 |
| H | 2.70653000  | 6.66950700  | -10.21596800 |
| H | 2.82409000  | 1.84378300  | -5.86370500  |
| H | 1.86089600  | 2.73424300  | -7.06659000  |
| H | 3.00282900  | 4.33354300  | -5.45971600  |
| H | 2.80612600  | -2.95806500 | -14.43641600 |
| H | 2.84250700  | -2.45602400 | -16.14900000 |
| H | 0.89277600  | -1.00707600 | -16.13836200 |
| H | -0.15641400 | 1.17883300  | -15.41098100 |
| H | 4.21064500  | -0.09453800 | -13.60887100 |
| H | 0.95164800  | 2.54154200  | -13.60298500 |
| H | 4.10961600  | -6.11951700 | -7.65386600  |
| H | 5.72784100  | -6.21191300 | -8.39592000  |
| H | 4.59464100  | 3.67059700  | -5.93733400  |
| H | 3.61561200  | 4.56590500  | -7.12518800  |
| H | 2.34215200  | 6.27032400  | -11.92225700 |
| H | 3.78907700  | 5.57765200  | -11.13109800 |
| H | -4.42345300 | -1.43439900 | -9.44408500  |
| H | -4.73140300 | -1.48977400 | -11.20609500 |
| H | 4.91133600  | -2.36545100 | -14.26066900 |
| H | 3.07142300  | 1.88253900  | -12.91035800 |

**Table S20.** Coordinates of the optimized structure of Big-Popt model for Ox/Pyr with pyridine ring flipped.

|    |             |             |              |
|----|-------------|-------------|--------------|
| C  | 5.09699800  | -5.63199200 | -7.70100500  |
| C  | 4.93077300  | -4.23170500 | -8.29735000  |
| S  | 3.98875600  | -4.28368300 | -9.89869700  |
| C  | -4.05299600 | -1.83399700 | -10.40299700 |
| C  | -2.61650200 | -1.31544300 | -10.48670000 |
| S  | -1.63363100 | -1.79995800 | -8.98718000  |
| C  | 2.73799900  | 5.86799600  | -10.97300000 |
| C  | 1.91843500  | 4.72963700  | -10.37543700 |
| O  | 1.60317400  | 3.82914600  | -11.45341500 |
| C  | 0.63557400  | 5.22920400  | -9.69618000  |
| C  | 3.56399900  | 3.85498300  | -6.28401800  |
| C  | 2.88318200  | 2.55821800  | -6.73317600  |
| S  | 3.96778400  | 1.64125500  | -7.92916800  |
| Fe | 2.86385200  | -2.36584300 | -10.09904800 |
| S  | 2.00706600  | -1.75606500 | -8.03449800  |
| Fe | 0.47523900  | -1.30560400 | -9.54147200  |
| S  | 1.10955500  | -2.44921500 | -11.46712300 |
| Fe | 1.97134200  | -0.33086400 | -11.53338700 |
| S  | 4.03440600  | -0.49551400 | -10.76012500 |
| Fe | 2.65944900  | 0.21484500  | -9.06606300  |
| S  | 0.77033400  | 0.95118300  | -10.04842600 |
| O  | 4.60300000  | -2.14699100 | -15.15998000 |
| C  | 3.26276500  | -2.13182000 | -15.63664500 |
| C  | 2.36417400  | -1.12109500 | -14.94476900 |
| C  | 2.88876800  | -0.07774500 | -14.17570300 |
| C  | 2.00169300  | 0.81689100  | -13.53516400 |
| C  | 0.96315600  | -1.18896000 | -15.07780800 |
| N  | 0.09495300  | -0.33956700 | -14.51072100 |
| C  | 0.61390900  | 0.63360200  | -13.73655900 |
| H  | 4.38585300  | -3.57757600 | -7.59982700  |
| H  | 5.91324100  | -3.77064200 | -8.49199400  |
| H  | 5.67701200  | -5.58266100 | -6.76070100  |
| H  | -2.60452000 | -0.21606500 | -10.56700900 |
| H  | -2.11248500 | -1.72081600 | -11.37837000 |
| H  | -4.07258800 | -2.93461900 | -10.33943500 |
| H  | 2.54063000  | 4.19798400  | -9.62723800  |

|   |             |             |              |
|---|-------------|-------------|--------------|
| H | 0.06039300  | 4.38364000  | -9.28329900  |
| H | 0.86176400  | 5.92320600  | -8.86691000  |
| H | -0.00235300 | 5.75354000  | -10.42886800 |
| H | 1.30663100  | 2.98715800  | -11.03720100 |
| H | 3.02193800  | 6.59793700  | -10.19633100 |
| H | 2.68574800  | 1.90495400  | -5.86733500  |
| H | 1.91583300  | 2.77532000  | -7.21324200  |
| H | 2.93200200  | 4.39309200  | -5.55312000  |
| H | 2.79433600  | -3.13610100 | -15.57166100 |
| H | 3.34302900  | -1.88486400 | -16.71045400 |
| H | 3.97051300  | 0.04354000  | -14.07618100 |
| H | 2.37041600  | 1.71797400  | -13.02737500 |
| H | 0.51397700  | -1.98633100 | -15.68669400 |
| H | -0.10161600 | 1.32213900  | -13.27504500 |
| H | 4.11608100  | -6.08275000 | -7.47869600  |
| H | 5.62843600  | -6.30312600 | -8.39683700  |
| H | 4.53689300  | 3.64546800  | -5.80863500  |
| H | 3.74604900  | 4.52310000  | -7.14152900  |
| H | 2.15453400  | 6.39282700  | -11.74967800 |
| H | 3.65596600  | 5.47410000  | -11.43760300 |
| H | -4.56932700 | -1.43505100 | -9.51360100  |
| H | -4.62566300 | -1.53001700 | -11.29884400 |
| H | 4.58131200  | -2.42220100 | -14.22195700 |

**Table S21.** Coordinates of the optimized structure of Big-Popt model for Ox/PyrH<sup>+</sup> with pyridine ring flipped.

|    |             |             |              |
|----|-------------|-------------|--------------|
| C  | 5.09700000  | -5.63200000 | -7.70099900  |
| C  | 4.73474400  | -4.19930400 | -8.08788700  |
| S  | 3.77006800  | -4.17454100 | -9.67240900  |
| C  | -4.05299800 | -1.83399900 | -10.40299900 |
| C  | -2.67858600 | -1.21586300 | -10.68326800 |
| S  | -1.54429700 | -1.50771500 | -9.24347600  |
| C  | 2.73800000  | 5.86800000  | -10.97300100 |
| C  | 1.32751800  | 5.60765200  | -11.51207500 |
| O  | 1.14240300  | 4.21363000  | -11.85334500 |
| C  | 1.02720200  | 6.40162300  | -12.77881300 |
| C  | 3.56399800  | 3.85499700  | -6.28400100  |
| C  | 2.75497500  | 2.65885700  | -6.78748400  |
| S  | 3.90196300  | 1.33863200  | -7.41010500  |
| Fe | 2.88190200  | -2.19888900 | -9.90796200  |
| S  | 1.81121900  | -1.66053600 | -8.02900800  |
| Fe | 0.54511000  | -1.00924400 | -9.74187000  |
| S  | 1.41421000  | -2.09466700 | -11.53171000 |
| Fe | 2.58039500  | -0.15810900 | -11.50194800 |
| S  | 4.36715200  | -0.58595600 | -10.24994400 |
| Fe | 2.77443400  | 0.16953500  | -8.89624000  |
| S  | 1.21471900  | 1.13282600  | -10.14367300 |
| O  | 4.60300000  | -2.14699900 | -15.16000000 |
| C  | 3.19617200  | -2.19560500 | -14.89055500 |
| C  | 2.73523900  | -0.84332600 | -14.40935900 |
| C  | 3.50816000  | -0.16775000 | -13.38678800 |
| C  | 3.12527200  | 1.18414500  | -13.03169100 |
| C  | 1.59618200  | -0.26398800 | -14.89500700 |
| N  | 1.18458400  | 0.97473700  | -14.40250600 |
| C  | 1.91092600  | 1.69025000  | -13.51699400 |
| H  | 4.11748600  | -3.72483100 | -7.30936800  |
| H  | 5.63693900  | -3.58237600 | -8.22811900  |
| H  | 5.67742100  | -5.63246000 | -6.76143000  |
| H  | -2.76420600 | -0.12918400 | -10.84831700 |
| H  | -2.22637400 | -1.66452400 | -11.58246400 |
| H  | -3.97306800 | -2.92200500 | -10.24883100 |
| H  | 0.58651900  | 5.88438100  | -10.73370900 |

|   |             |             |              |
|---|-------------|-------------|--------------|
| H | 0.01108300  | 6.17937200  | -13.14136700 |
| H | 1.09959400  | 7.48401800  | -12.58549500 |
| H | 1.74731800  | 6.14366500  | -13.57390200 |
| H | 1.22287400  | 3.67358800  | -11.04056400 |
| H | 2.86689900  | 6.92862900  | -10.69758400 |
| H | 2.14681300  | 2.22461400  | -5.97768400  |
| H | 2.07282900  | 2.95436800  | -7.59920200  |
| H | 2.88655000  | 4.63036900  | -5.88345600  |
| H | 2.96852400  | -2.93175900 | -14.09374000 |
| H | 2.63041600  | -2.49438000 | -15.79542800 |
| H | 4.54831300  | -0.48012900 | -13.27620800 |
| H | 3.80953100  | 1.87669900  | -12.53418200 |
| H | 0.95441400  | -0.71130300 | -15.65451100 |
| H | 1.53013000  | 2.67574800  | -13.22400500 |
| H | 4.19372200  | -6.24350800 | -7.54531400  |
| H | 5.70901300  | -6.11722900 | -8.47892100  |
| H | 4.25495200  | 3.55865300  | -5.47809600  |
| H | 4.16133100  | 4.30281400  | -7.09446700  |
| H | 3.49405600  | 5.61284400  | -11.73465900 |
| H | 2.93947300  | 5.26244900  | -10.07296700 |
| H | -4.50981200 | -1.39503700 | -9.50129700  |
| H | -4.73317500 | -1.65457400 | -11.25494400 |
| H | 4.98558000  | -3.00683500 | -14.91067500 |
| H | 0.29140500  | 1.35220200  | -14.71330000 |

**Table S22.** Coordinates of the optimized structure of Big-Popt model for Red/Pyr with pyridine ring flipped.

|    |             |             |              |
|----|-------------|-------------|--------------|
| C  | 5.09700400  | -5.63194000 | -7.70103300  |
| C  | 4.65496800  | -4.23855500 | -8.16175800  |
| S  | 3.96366100  | -4.27195400 | -9.88563400  |
| C  | -4.05295700 | -1.83397100 | -10.40300400 |
| C  | -2.69973400 | -1.14610000 | -10.62840300 |
| S  | -1.51385600 | -1.49147000 | -9.23468400  |
| C  | 2.73799700  | 5.86800000  | -10.97300000 |
| C  | 1.78057800  | 4.75233200  | -10.55874600 |
| O  | 1.30315300  | 4.13547900  | -11.76849800 |
| C  | 0.59904100  | 5.27447100  | -9.72728800  |
| C  | 3.56398200  | 3.85491600  | -6.28404500  |
| C  | 2.89049800  | 2.63907700  | -6.93579300  |
| S  | 3.89057800  | 2.02039700  | -8.36807800  |
| Fe | 2.91350200  | -2.25012900 | -10.14574600 |
| S  | 2.05029000  | -1.36348900 | -8.29683800  |
| Fe | 0.54547600  | -1.12725500 | -9.97063700  |
| S  | 1.17484600  | -2.42792900 | -11.66493200 |
| Fe | 2.04800100  | -0.34417900 | -12.04619500 |
| S  | 4.15522900  | -0.46872300 | -11.04384900 |
| Fe | 2.76537000  | 0.42367900  | -9.54701700  |
| S  | 0.82621100  | 0.98546500  | -10.65890700 |
| O  | 4.60297400  | -2.14700500 | -15.15991800 |
| C  | 3.19183400  | -2.41434600 | -15.17448200 |
| C  | 2.31660000  | -1.20147100 | -14.94070200 |
| C  | 2.76942500  | -0.14350300 | -14.08442500 |
| C  | 1.84899600  | 0.92773000  | -13.82198300 |
| C  | 1.04608500  | -1.11862500 | -15.48247800 |
| N  | 0.15909800  | -0.09510600 | -15.26169900 |
| C  | 0.56875200  | 0.87252800  | -14.44945200 |
| H  | 3.88256900  | -3.83872300 | -7.48565500  |
| H  | 5.50830300  | -3.54037500 | -8.13319500  |
| H  | 5.51494800  | -5.59580800 | -6.67554600  |
| H  | -2.83270800 | -0.05427200 | -10.71800500 |
| H  | -2.24440600 | -1.50271000 | -11.56604800 |
| H  | -3.92630700 | -2.92797900 | -10.33476800 |
| H  | 2.34393200  | 4.00948000  | -9.96045200  |

|   |             |             |              |
|---|-------------|-------------|--------------|
| H | -0.06751500 | 4.44091400  | -9.45034700  |
| H | 0.94138900  | 5.76097600  | -8.79561200  |
| H | 0.01299800  | 6.00600200  | -10.31304200 |
| H | 1.03217100  | 3.21922100  | -11.52954600 |
| H | 3.13856300  | 6.39220600  | -10.08829100 |
| H | 2.77718600  | 1.82342100  | -6.20170700  |
| H | 1.87967100  | 2.90759900  | -7.28523800  |
| H | 2.97255900  | 4.22532800  | -5.42347000  |
| H | 2.94085100  | -3.17784900 | -14.40844900 |
| H | 2.97753400  | -2.85331000 | -16.16432300 |
| H | 3.84336000  | 0.00340300  | -13.94200400 |
| H | 2.18775500  | 1.87893400  | -13.39819800 |
| H | 0.68310000  | -1.91317400 | -16.15030900 |
| H | -0.13809800 | 1.69571100  | -14.27653200 |
| H | 4.24426300  | -6.33233200 | -7.70261100  |
| H | 5.86963700  | -6.04438900 | -8.37345200  |
| H | 4.57420000  | 3.59511100  | -5.92326800  |
| H | 3.67149100  | 4.67829500  | -7.01044600  |
| H | 2.21836100  | 6.60388600  | -11.61377200 |
| H | 3.58176400  | 5.44671900  | -11.54222700 |
| H | -4.51886500 | -1.49191200 | -9.46196300  |
| H | -4.75217600 | -1.61627300 | -11.23384900 |
| H | 4.84688900  | -2.01897500 | -14.22252800 |

**Table S23.** Coordinates of the optimized structure of Big-Popt model for Red/Pyr+ with pyridine ring flipped

|    |             |             |              |
|----|-------------|-------------|--------------|
| C  | 5.09700100  | -5.63199700 | -7.70100200  |
| C  | 4.97386900  | -4.20327800 | -8.23681000  |
| S  | 4.01978500  | -4.17571200 | -9.82702500  |
| C  | -4.05300100 | -1.83400100 | -10.40300200 |
| C  | -2.62790700 | -1.31379900 | -10.62304400 |
| S  | -1.51915700 | -1.80474800 | -9.21865600  |
| C  | 2.73800500  | 5.86797600  | -10.97300400 |
| C  | 1.81037500  | 4.80713800  | -10.38986400 |
| O  | 1.50119900  | 3.88297500  | -11.44939800 |
| C  | 0.52162600  | 5.40559100  | -9.80948200  |
| C  | 3.56400000  | 3.85501300  | -6.28399100  |
| C  | 2.90794900  | 2.51237500  | -6.63090000  |
| S  | 3.94212800  | 1.61376700  | -7.88388600  |
| Fe | 3.01197200  | -2.20791600 | -10.04598100 |
| S  | 2.00784400  | -1.68193100 | -8.09973300  |
| Fe | 0.57512200  | -1.20542600 | -9.74859000  |
| S  | 1.43947800  | -2.25326500 | -11.59786900 |
| Fe | 2.38944400  | -0.18699400 | -11.62610400 |
| S  | 4.29325100  | -0.44151200 | -10.48978600 |
| Fe | 2.75367100  | 0.18135500  | -9.04421400  |
| S  | 1.01431500  | 0.99582600  | -10.17321600 |
| O  | 4.60299600  | -2.14699100 | -15.16000000 |
| C  | 3.18062700  | -2.20002500 | -14.97338000 |
| C  | 2.58353200  | -0.88617700 | -14.51532100 |
| C  | 3.28609500  | -0.11386900 | -13.50404300 |
| C  | 2.75348600  | 1.19764200  | -13.16805400 |
| C  | 1.37388000  | -0.45838600 | -14.98388600 |
| N  | 0.81258400  | 0.72433900  | -14.49040300 |
| C  | 1.46777200  | 1.52406400  | -13.60713900 |
| H  | 4.45140300  | -3.56122500 | -7.51082100  |
| H  | 5.96951000  | -3.76421700 | -8.41621700  |
| H  | 5.68287800  | -5.64558300 | -6.76282600  |
| H  | -2.62821600 | -0.21403400 | -10.70747500 |
| H  | -2.21265300 | -1.72255800 | -11.55918300 |
| H  | -4.06250400 | -2.93429600 | -10.33092500 |
| H  | 2.35025700  | 4.26612800  | -9.58796300  |



|   |             |             |              |
|---|-------------|-------------|--------------|
| H | -0.12320600 | 4.60873100  | -9.40360900  |
| H | 0.73756800  | 6.11970200  | -8.99468800  |
| H | -0.04010900 | 5.93459400  | -10.59917200 |
| H | 1.30937100  | 3.01129000  | -11.02099900 |
| H | 3.01065800  | 6.61881800  | -10.21190600 |
| H | 2.80881300  | 1.88312600  | -5.73022100  |
| H | 1.89770900  | 2.66780000  | -7.04287200  |
| H | 2.97299000  | 4.39772800  | -5.52236500  |
| H | 2.91382200  | -2.98052500 | -14.23284300 |
| H | 2.75103000  | -2.49843000 | -15.94423400 |
| H | 4.36665700  | -0.25849900 | -13.43869100 |
| H | 3.34752800  | 1.97939800  | -12.68905500 |
| H | 0.76705000  | -1.00356200 | -15.70846700 |
| H | 0.97261100  | 2.45055700  | -13.30951700 |
| H | 4.10235000  | -6.05926600 | -7.49344200  |
| H | 5.60184100  | -6.28924200 | -8.42934900  |
| H | 4.58157100  | 3.70456200  | -5.88545800  |
| H | 3.64673800  | 4.49517500  | -7.17768000  |
| H | 2.24381600  | 6.38836300  | -11.81253200 |
| H | 3.66110400  | 5.40098400  | -11.35132300 |
| H | -4.47898700 | -1.43214900 | -9.46838900  |
| H | -4.71358300 | -1.53618100 | -11.23927900 |
| H | 5.01107200  | -2.31899200 | -14.29155300 |
| H | -0.15382900 | 0.94012500  | -14.71912100 |

**Table S24.** Comparison of the B-factors of the ligand's ring atoms in the original structure as well as the structure with flipped ring atoms.

| Atom number | Atom type | B <sub>average</sub> (IspH-10) | B <sub>average</sub> (ring flipped) |
|-------------|-----------|--------------------------------|-------------------------------------|
| 1           | C         | 35,85                          | 34,3                                |
| 2           | C         | 36,9                           | 35,8                                |
| 3           | N         | 39,6                           | 37                                  |
| 4           | C         | 43,75                          | 41,1                                |
| 5           | C         | 38,85                          | 36,1                                |
| 6           | C         | 40,55                          | 39,9                                |

## References

- (1) Gräwert, T.; Span, I.; Eisenreich, W.; Rohdich, F.; Eppinger, J.; Bacher, A.; Groll, M. *Proc. Natl. Acad. Sci. U. S. A.* **2010**, *107*, 1077-1081.
- (2) Span, I.; Wang, K.; Wang, W.; Jauch, J.; Eisenreich, W.; Bacher, A.; Oldfield, E.; Groll, M. *Angew. Chem. Int. Edit.* **2013**, *52*, 2118-2121.
- (3) Wang, W.; Li, J.; Wang, K.; Smirnova, T. I.; Oldfield, E. *J. Am. Chem. Soc.* **2011**, *133*, 6525.

Full citation of reference 46 in main text:

Frisch, M. J.; Trucks, G. W.; Schlegel, H. B.; Scuseria, G. E.; Robb, M. A.; Cheeseman, J. R.; Scalmani, G.; Barone, V.; Mennucci, B.; Petersson, G. A.; Nakatsuji, H.; Caricato, M.; Li, X.; Hratchian, H. P.; Izmaylov, A. F.; Bloino, J.; Zheng, G.; Sonnenberg, J. L.; Hada, M.; Ehara, M.; Toyota, K.; Fukuda, R.; Hasegawa, J.; Ishida, M.; Nakajima, T.; Honda, Y.; Kitao, O.; Nakai, H.; Vreven, T.; Montgomery, Jr., J. A.; J. Peralta, E.; Ogliaro, F.; Bearpark, M.; Heyd, J. J.; Brothers, E.; Kudin, K. N.; Staroverov, V. N.; Keith, T.; Kobayashi, R.; Normand, J.; Raghavachari, K.; Rendell, A.; Burant, J. C.; Iyengar, S. S.; Tomasi, J.; Cossi, M.; Rega, N.; Millam, J. M.; Klene, M.; Knox, J. E.; Cross, J. B.; Bakken, V.; Adamo, C.; Jaramillo, J.; Gomperts, R.; Stratmann, R. E.; Yazyev, O.; Austin, A. J.; Cammi, R.; Pomelli, C.; Ochterski, J. W.; Martin, R. L.; Morokuma, K.; Zakrzewski, V. G.; Voth, G. A.; Salvador, P.; Dannenberg, J. J.; Dapprich, S.; Daniels, A. D.; Farkas, O.; Foresman, J. B.; Ortiz, J. V.; Cioslowski, J.; Fox, D. J.; Gaussian 09, Revision B.01; Gaussian, Inc.: Wallingford CT, **2010**.
